# Supplementary material
Source: Elsevier journal article supplement (https://rcastoragev2.blob.core.windows.net/cecf3716a481919669948f82f168e495/mmc4.pdf)
Supplement: mmc4 [file mmc4.pdf]

# Supplementary Material

## Supplementary Figures

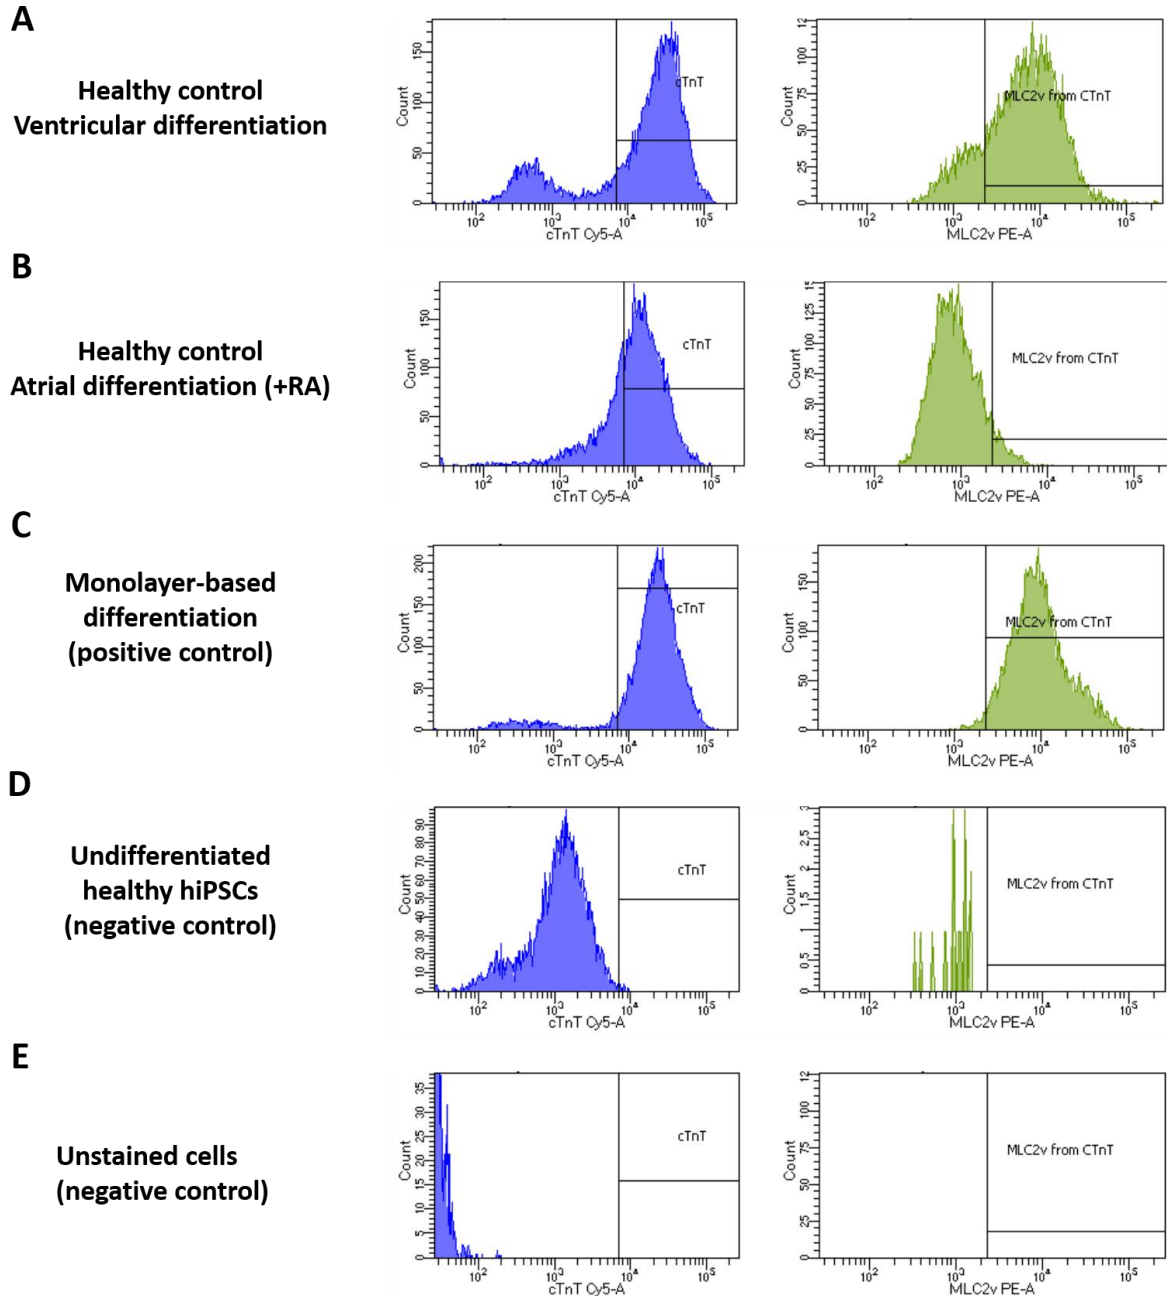

**Supplementary Figure 1. Flow-cytometry analysis of subtype-specific differentiations and controls.** Flow-cytometry analysis assessing cTnT and MLC2v expression in the following different conditions – [A,B] Ventricular and atrial (RA supplemented) differentiations of healthy hiPSCs, [C] positive control consisting of monolayer based cardiac

differentiations protocol yielding high proportion of cardiomyocytes with ventricular phenotype (Burridge P., Nat Methods, 2014); [D] negative control of undifferentiated healthy hiPSCs; [E] negative control of unstained cells.

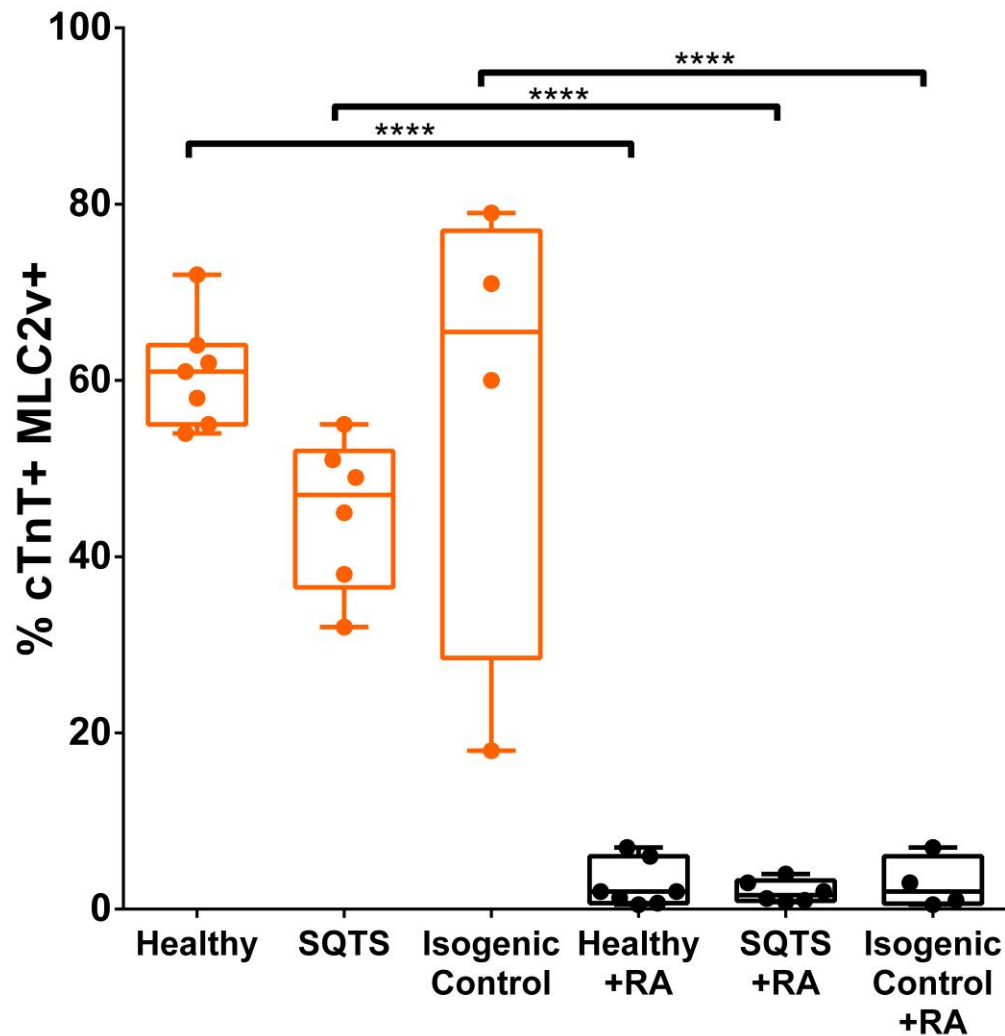

**Supplementary Figure 2. Flow cytometry analysis of chamber-specific differentiations.** Summary of flow cytometry experiments showing the percentages of cTnT+ MLC2v+ cells in both atrial and ventricular differentiations from the three different hiPSC lines utilized -healthy control, SQTS, and isogenic control. Values are presented in box and whiskers plots indicating minimum, lower quartile, median, upper quartile and maximum as well as the individual data points.

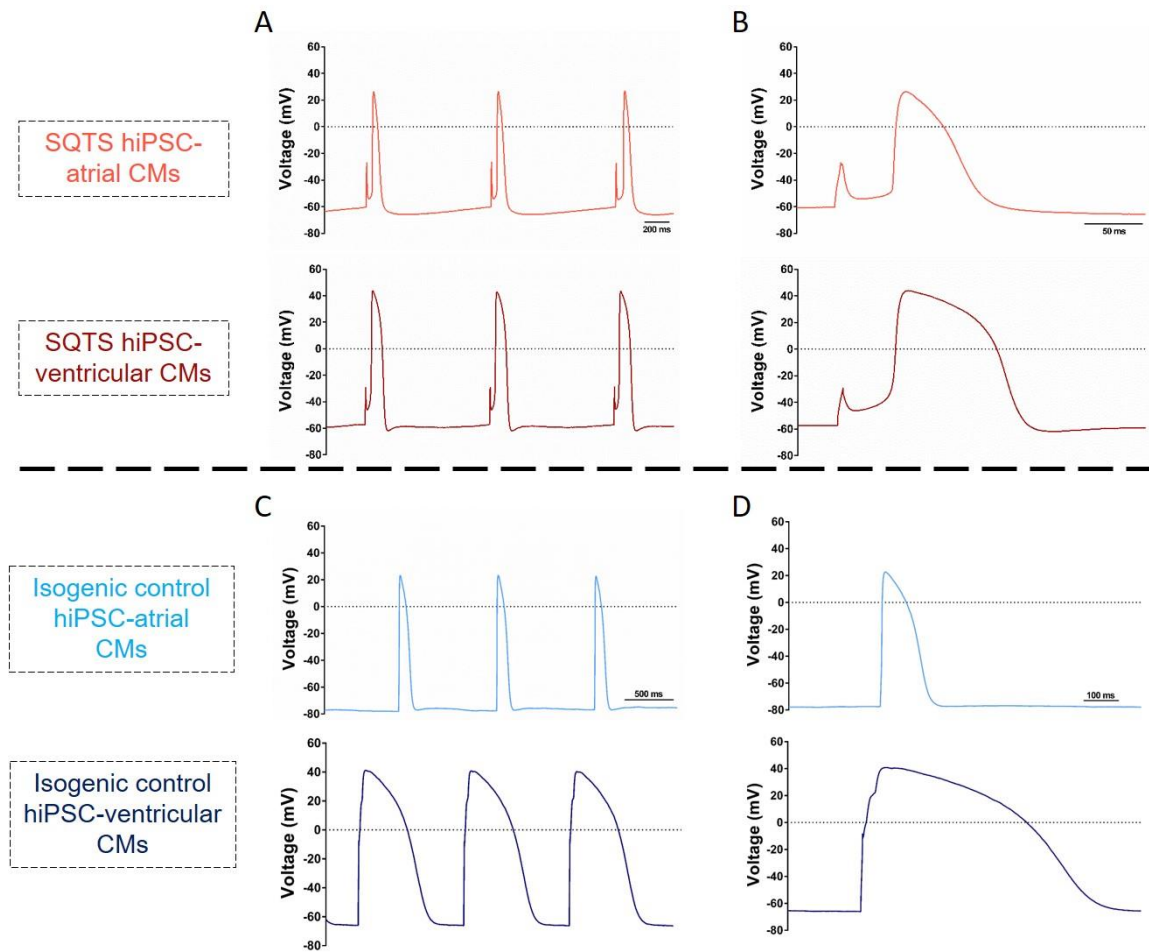

**Supplementary Figure 3. Parallel AP recordings of atrial and ventricular CMs.** Patch-clamp recordings of atrial and ventricular cardiomyocytes from both SQTS (A-B) and isogenic-control (C-D) cell lines at similar days of maturation (approximately 30 days old cardiomyocytes). All cells were paced at a similar frequency of 1Hz. Note the shorter AP and steeper repolarization in atrial myocytes, when compared to APs from their ventricular counterpart.

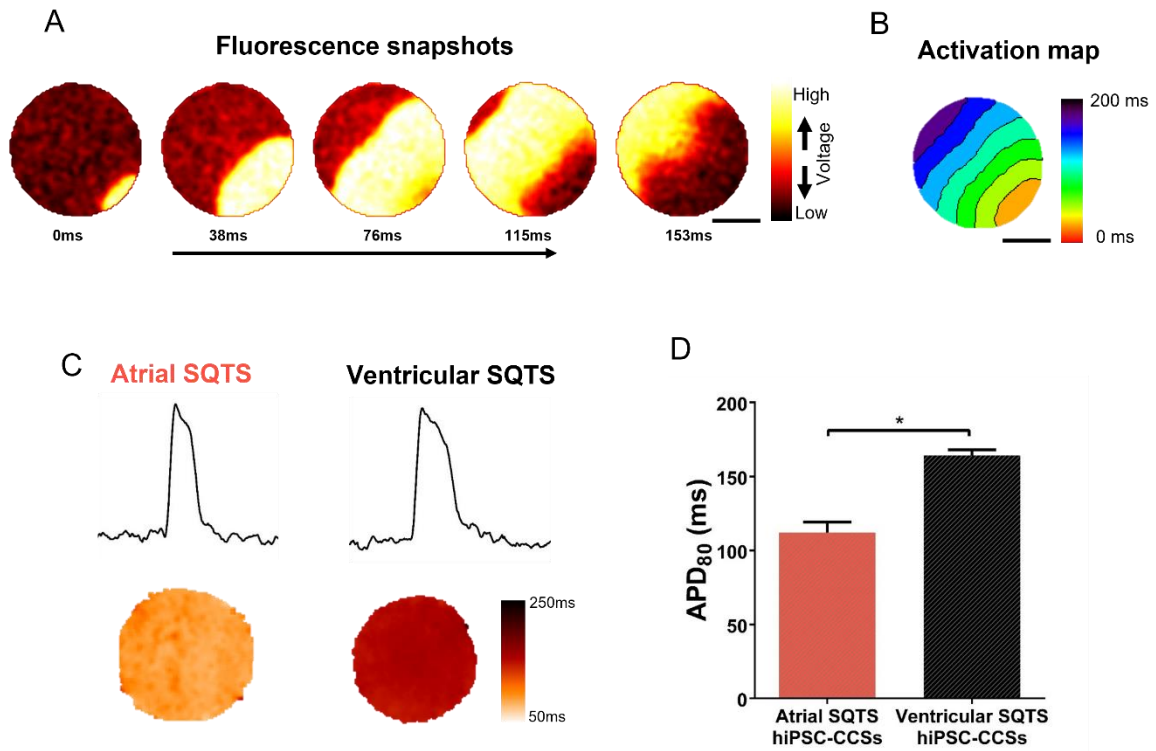

**Supplementary Figure 4. Optical mapping of atrial SQTs-hiPSC-CCSs.** [A-B] a sequence of fluorescence snapshots and the corresponding activation map as obtained for SQTs-hiPSC-ACS showing normal electrical activity propagating from the pacemaker site throughout the tissue. [C] Representative optical APs and the derived APD<sub>80</sub> maps obtained from atrial and ventricular SQTs-hiPSC-CCSs. [D] Summary of mean APD<sub>80</sub> values measured from atrial and ventricular SQTs-hiPSC-CCSs. Values are presented as means  $\pm$ SEM. \*,  $p < 0.05$

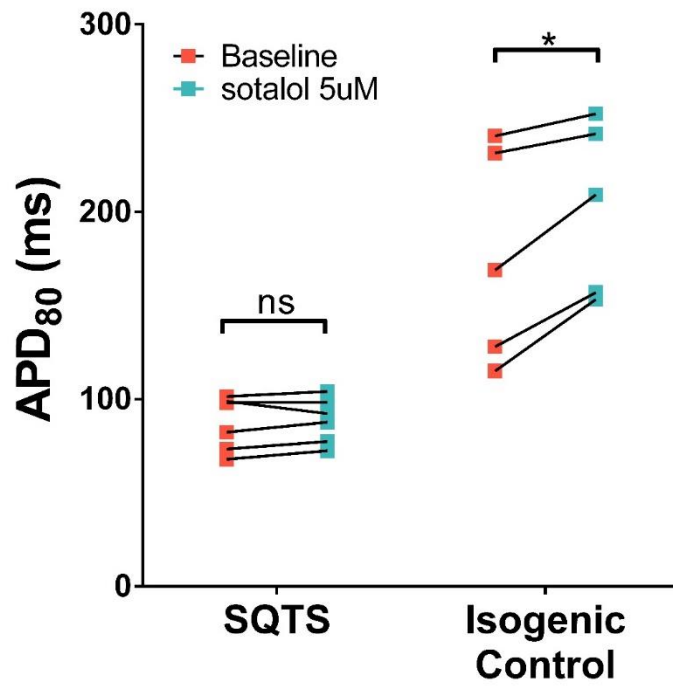

**Supplementary Figure 5. APD response to sotalol.** Summary of the APD<sub>80</sub> values obtained for SQTS and isogenic control hiPSC-ACSs at baseline and upon treatment with 5uM sotalol. \*,  $p < 0.05$

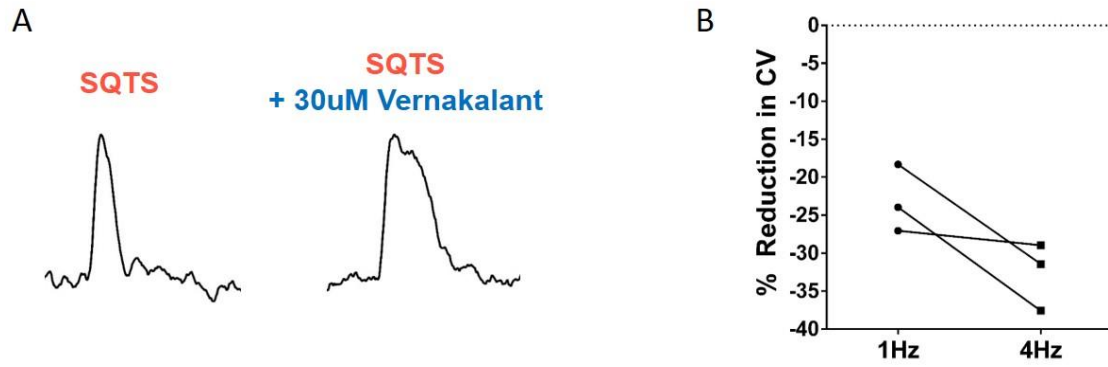

**Supplementary Figure 6. Rate-dependent effects of vernakalant.** [A] Representative optical AP obtained from SQTs-hiPSCs-ACSs at baseline and upon treatment with 30uM vernakalant. [B] Summary of the percentage of reduction in CV in SQTs-hiPSC-ACSs upon treatment with 30uM vernakalant at different pacing frequencies of 1Hz and 4Hz.

## **Supplementary Movie Legends**

**Supplementary Movie 1.** Beating embryoid-body (EB) resulting from the hiPSC chamber-specific ventricular and atrial differentiation protocols.

**Supplementary Movie 2.** Fluorescence movie of normal AP propagation in SQTs- and isogenic control- hiPSC-ACSs.

**Supplementary Movie 3.** Fluorescence (top) and phase (bottom) movies of spiral-waves (rotors) induced in SQTs- and isogenic control- hiPSC-ACSs.

## **Supplementary References**

Burridge, Paul W et al. “Chemically defined generation of human cardiomyocytes.” *Nature methods* vol. 11,8 (2014): 855-60. doi:10.1038/nmeth.2999
